# Supplementary material for: Decorrelated singlet and triplet exciton delocalization in acetylene-bridged Zn-porphyrin dimers
Source: Royal Society of Chemistry journal article supplement (doi:10.1039/d3sc03327a), 2023-12-19
Supplement: d3sc03327a1.pdf [file d3sc03327a1.pdf]

# Electronic Supporting Information for Decorrelated Singlet and Triplet Exciton Delocalization in Acetylene-Bridged Zn-Porphyrin Dimers

Hasini Medagedara,<sup>†</sup> Mandefro Y. Teferi,<sup>‡</sup> Sachithra T. Wanasinghe,<sup>†</sup>  
Wade Burson,<sup>†</sup> Shahad Kizi,<sup>†</sup> Bradly Zaslona,<sup>†</sup> Kristy Mardis,<sup>¶</sup> Jens  
Niklas,<sup>‡</sup> Oleg G. Poluektov,<sup>\*,‡</sup> and Aaron S. Rury<sup>\*,†</sup>

<sup>†</sup>*Department of Chemistry, Wayne State University, Detroit, MI 48202, USA*

<sup>‡</sup>*Chemical Sciences and Engineering Division, Argonne National Laboratory, Lemont, IL 60439,  
USA*

<sup>¶</sup>*Department of Chemistry, Physics, and Engineering Sciences, Chicago State University,  
Chicago, IL, 60628, USA*

E-mail: oleg@anl.gov; arury@wayne.edu

## List of Figures

|    |                                                                                                                                                                                                                                                                                                                                                |    |
|----|------------------------------------------------------------------------------------------------------------------------------------------------------------------------------------------------------------------------------------------------------------------------------------------------------------------------------------------------|----|
| S1 | Structures of Fb-M , Fb <sub>2</sub> U-D, and ZnFbU-D. . . . .                                                                                                                                                                                                                                                                                 | S3 |
| S2 | Proton NMR spectra of F <sub>30</sub> Zn <sub>2</sub> U-D in CDCl <sub>3</sub> . . . . .                                                                                                                                                                                                                                                       | S4 |
| S3 | Proton NMR spectra of Zn <sub>2</sub> U-D in CDCl <sub>3</sub> . . . . .                                                                                                                                                                                                                                                                       | S4 |
| S4 | MALDI-TOF mass spectra of F <sub>30</sub> Zn <sub>2</sub> U-D and Zn <sub>2</sub> U-D . . . . .                                                                                                                                                                                                                                                | S5 |
| S5 | Comparisons between the measured Q state absorption (green) and fluorescence (red) spectra of Zn-M (top left panel), F <sub>20</sub> Zn-M (top right panel), Zn <sub>2</sub> U-D (bottom left panel), and F <sub>30</sub> Zn <sub>2</sub> U-D (bottom right panel). . . . .                                                                    | S7 |
| S6 | Transient transmission spectra of Zn-M (top left panel), F <sub>20</sub> Zn-M (top right panel), Zn <sub>2</sub> U-D (bottom left panel), and F <sub>30</sub> Zn <sub>2</sub> U-D (bottom right panel) after photoexcitation at 2.85 eV. . . . .                                                                                               | S8 |
| S7 | Comparisons between the measured (solid green) and simulated (dashed red) spectra of Zn-M (top panel) and Zn <sub>2</sub> U-D (bottom panel), which also show the assignments of transitions at the X <sup>+</sup> , X <sup>-</sup> , Y <sup>+</sup> , Y <sup>-</sup> , Z <sup>+</sup> , and Z <sup>-</sup> canonical field strengths. . . . . | S9 |

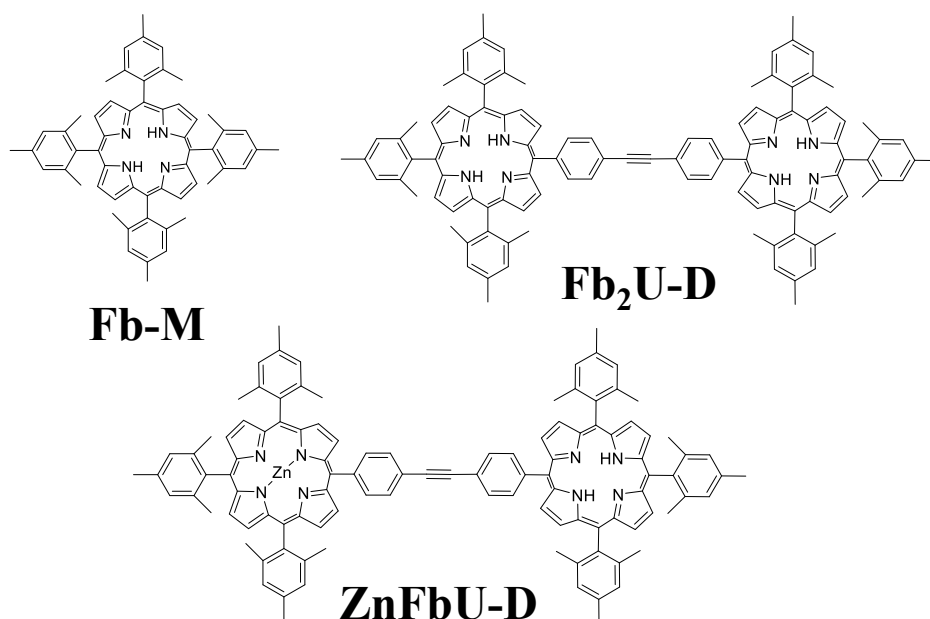

Figure S1: Structures of Fb-M , Fb<sub>2</sub>U-D, and ZnFbU-D.

## 1 Chemical Structures of Model Chromophores

Fig. S1 shows the structures of Fb-M, Fb<sub>2</sub>U-D, and ZnFbU-D, which were studied as models for time-resolved EPR and ENDOR measurements of these molecules' triplet states.

## 2 Synthesis and Characterization of Model Porphyrin Macromolecules

The chemical compounds mesitaldehyde, 4-iodophenyl benzaldehyde, 2,3-dichloro-5,6-dicyano-1,4-benzoquinone, triethylamine and pentafluoro benzaldehyde were purchased from Oakwood Chemical USA. Pyrrole, boron trifluoride etherate, 4-[2-(trimethylsilyl) ethynyl]benzaldehyde, tetrabutylammonium fluoride on silica, tris(dibenzylideneacetone)dipalladium(0), triphenylarsine, sodium bicarbonate and zinc acetate were purchased from Sigma Aldrich USA. Freebase porphyrin monomer 5,10,15,20-tetrakis(pentafluorophenyl)porphyrin was purchased from TCI Chemical USA. Bio-Beads SX-1 styrene divinylbenzene beads for size exclusion chromatography was

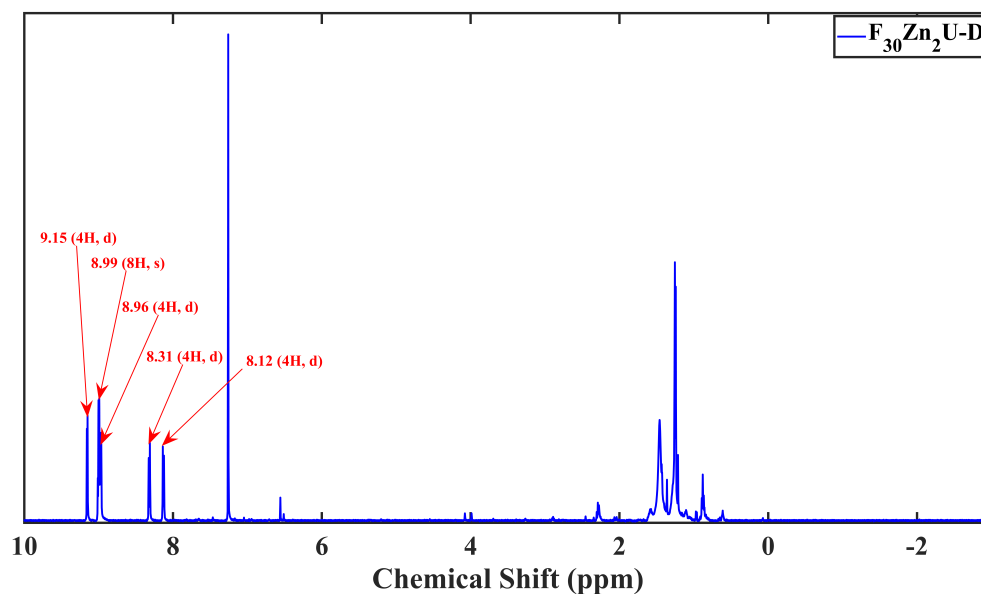

Figure S2: Proton NMR spectra of  $F_{30}Zn_2U-D$  in  $CDCl_3$

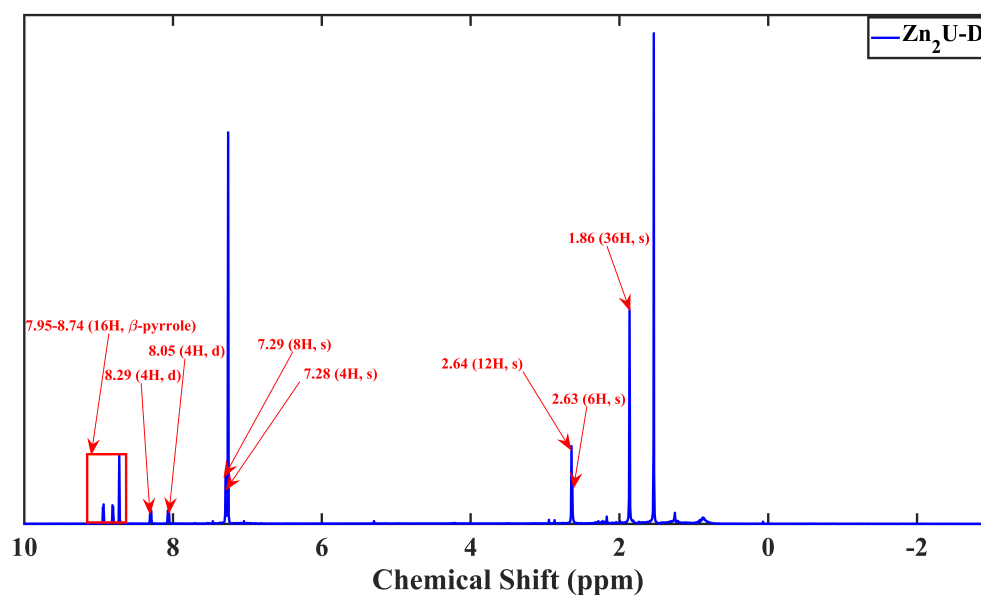

Figure S3: Proton NMR spectra of  $Zn_2U-D$  in  $CDCl_3$

purchased from Bio-Rad Laboratories USA. Synthesis of 5,10,15,20-tetrakis(mesityl)porphyrin (Fb-M), zinc porphyrin monomers and dimers were carried out according to previously reported studies. The synthesized porphyrins were characterized using nuclear magnetic resonance (NMR) in  $CDCl_3$  and MALDI-TOF mass spectrometry.

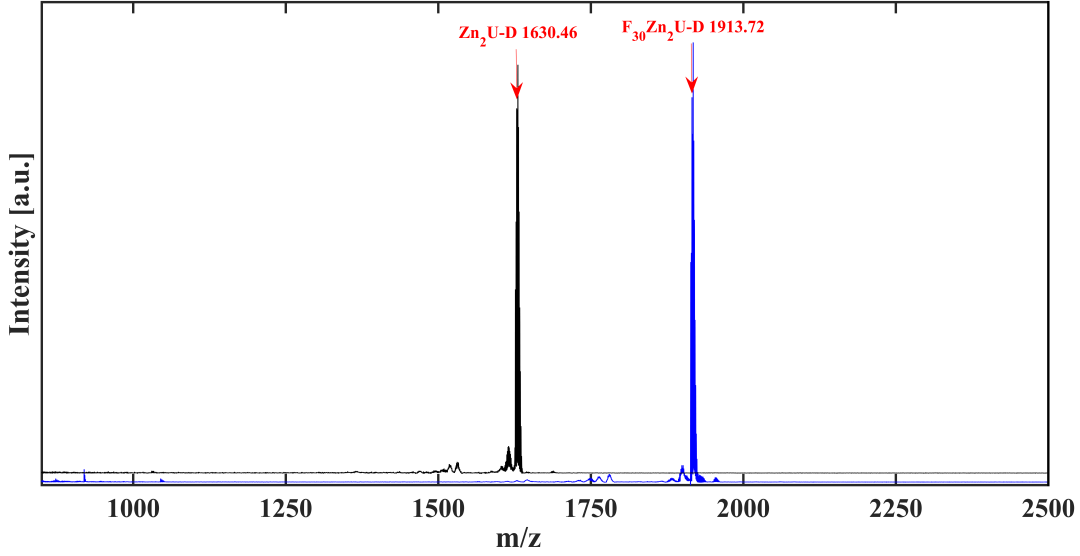

Figure S4: MALDI-TOF mass spectra of  $F_{30}Zn_2U-D$  and  $Zn_2U-D$

### 3 Steady-State UV-vis Absorption and Fluorescence Spectra

#### 3.1 Soret Resonance

We modeled the absorption spectrum of  $Zn_2U-D$  using the following equation,

$$A(E) = I_1 \exp\left(-\left[\frac{E - E_1}{2\Delta E_1}\right]^2\right) + I_2 \exp\left(-\left[\frac{E - E_2}{2\Delta E_2}\right]^2\right) + I_3 \exp\left(-\left[\frac{E - E_3}{2\Delta E_3}\right]^2\right) + mE + b, \quad (S1)$$

where we assign the peaks corresponding to the first, second, and fourth terms of Eq. (S1) as resulting from the x-polarized 0-0, the y-polarized 0-0, and 0-1 vibronic transition. Given their low intensities, we propose the x- and y-polarized 0-1 vibronic transitions do not couple in  $Zn_2U-D$ . We assign the third term in Eq. (S1) as stemming from H-aggregates that form in face-to-face orientations in the solution at sufficiently high concentrations. The last terms of Eq. (S1),  $(mE + b)$ , represent a sloping background to the spectra.

We modeled the absorption spectrum of  $Zn-M$ ,  $F_{20}Zn-M$ , and  $F_{30}Zn_2U-D$  using the following

equation,

$$\begin{aligned}
 A(E) = & I_1 \exp\left(-\left[\frac{E - E_1}{2\Delta E_1}\right]^2\right) + I_2 \exp\left(-\left[\frac{E - E_2}{2\Delta E_2}\right]^2\right) \quad (\text{S2}) \\
 & + I_3 \exp\left(-\left[\frac{E - E_3}{2\Delta E_3}\right]^2\right) + mE + b,
 \end{aligned}$$

where we assign the peaks corresponding to the first and third terms of Eq. (S2) as resulting from the 0-0 and 0-1 vibronic structures of the Soret resonance of individual molecules of each porphyrin species. We propose the second term in Eq. (S1) stems from H-aggregates that form in face-to-face orientations in the solution at sufficiently high concentrations. The terms  $(mE + b)$  represent a sloping background in each spectrum. We report the important model values found by fitting our data to Eqs. (S1) and in (S2) Table SI.

**Table S1: Quantitative comparison between the intensities, energies, and widths of the Soret absorption peaks of Zn-M, F<sub>20</sub>Zn-M, Zn<sub>2</sub>U-D and F<sub>30</sub>Zn<sub>2</sub>U-D in toluene**

| Sample                              | I <sub>1</sub> [O. D.] | E <sub>1</sub> [eV] | ΔE <sub>1</sub> [meV] | I <sub>2</sub> [O. D.] | E <sub>2</sub> [eV] | ΔE <sub>2</sub> [meV] | I <sub>3</sub> [O. D.] | E <sub>3</sub> [eV] | ΔE <sub>3</sub> [meV] |
|-------------------------------------|------------------------|---------------------|-----------------------|------------------------|---------------------|-----------------------|------------------------|---------------------|-----------------------|
| Zn-M                                | 0.676±0.041            | 2.94±0.01           | 19.7±0.2              | 0.082±0.004            | 3.00±0.00           | 14.6±1.8              | 0.048±0.006            | 3.09±0.00           | 28.11±2.7             |
| F <sub>20</sub> Zn-M                | 0.402±0.001            | 2.94±0.00           | 23.2±0.1              | 0.043 ±0.005           | 3.01±0.00           | 17.5±0.5              | 0.041±0.001            | 3.08±0.00           | 39.5±2.7              |
| Zn <sub>2</sub> U-D                 | 0.425±0.044            | 2.90±0.01           | 26.6±1.7              | 0.199±0.080            | 2.96±0.01           | 21.2±2.5              | 0.044±0.006            | 3.042±0.03          | 50.0± 15.1            |
| F <sub>30</sub> Zn <sub>2</sub> U-D | 0.376±0.010            | 2.92±0.00           | 30.7±0.9              | -                      | -                   | -                     | 0.040±0.004            | 3.04±0.02           | 58.8±12.6             |

### 3.2 Q Resonance

The panels of Fig. S2 show comparisons between the measured Q state absorption and fluorescence spectra of Zn-M, F<sub>20</sub>Zn-M, Zn<sub>2</sub>U-D, and F<sub>30</sub>Zn<sub>2</sub>U-D. By comparing the structure of the spectra corresponding to monomers and dimer (Zn-M to Zn<sub>2</sub>U-D and F<sub>20</sub>Zn-M to F<sub>30</sub>Zn<sub>2</sub>U-D) we find no qualitative evidence of intermolecular Q-state exciton delocalization in either dimer. From this lack of evidence we propose the Q-state excitons must remain localized in one of the two porphyrin sub-units of Zn<sub>2</sub>U-D.

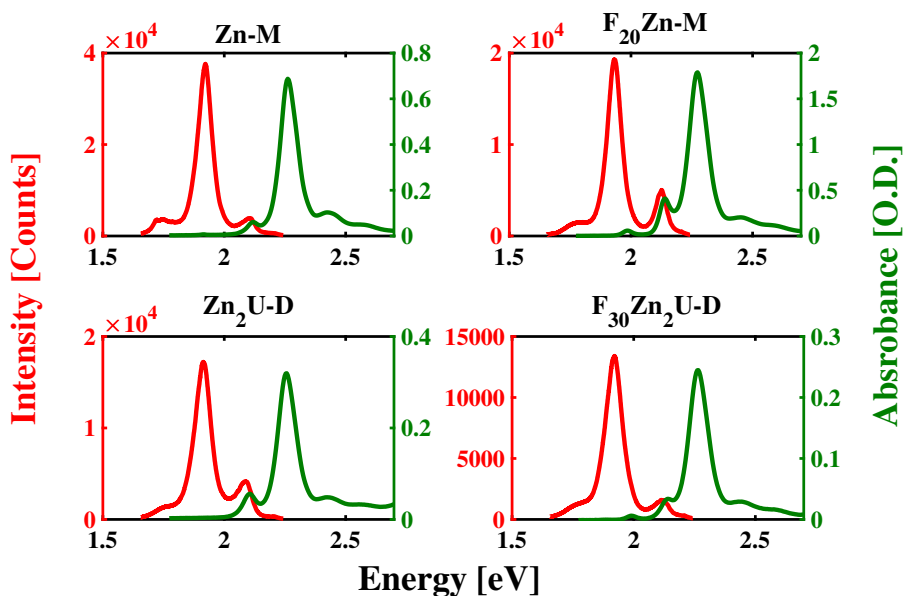

Figure S5: Comparisons between the measured Q state absorption (green) and fluorescence (red) spectra of Zn-M (top left panel),  $F_{20}$ Zn-M (top right panel),  $Zn_2$ U-D (bottom left panel), and  $F_{30}Zn_2$ U-D (bottom right panel).

## 4 Transient Transmission Spectra

The panels of Fig. S3 show the broadband transient transmission spectra of Zn-M,  $F_{20}$ Zn-M,  $Zn_2$ U-D, and  $F_{30}Zn_2$ U-D across the visible region of the excited state spectra following photoexcitation with a 2.85 eV (435 nm) pump pulse. The blue and red regions of the spectra indicate excited state absorption and ground state bleaching, respectively. The rise of stimulated emission appears as a feature at 1.9 eV due to depleted excited state absorption. Kinetic traces of these dynamics are shown in Fig. 3 of the main manuscript.

## 5 Time-Resolved EPR Spectra

The panels of Fig. S4 show comparisons between the measured and simulated TR-EPR spectra of Zn-M and  $Zn_2$ U-D. These panels include assignments of triplet transitions at the  $X^+$  and  $X^-$  canonical field strengths. These transitions overlap with those of the  $Z^+$  and  $Z^-$  canonical fields and complicate our analysis of these molecule's triplet ENDOR spectra.

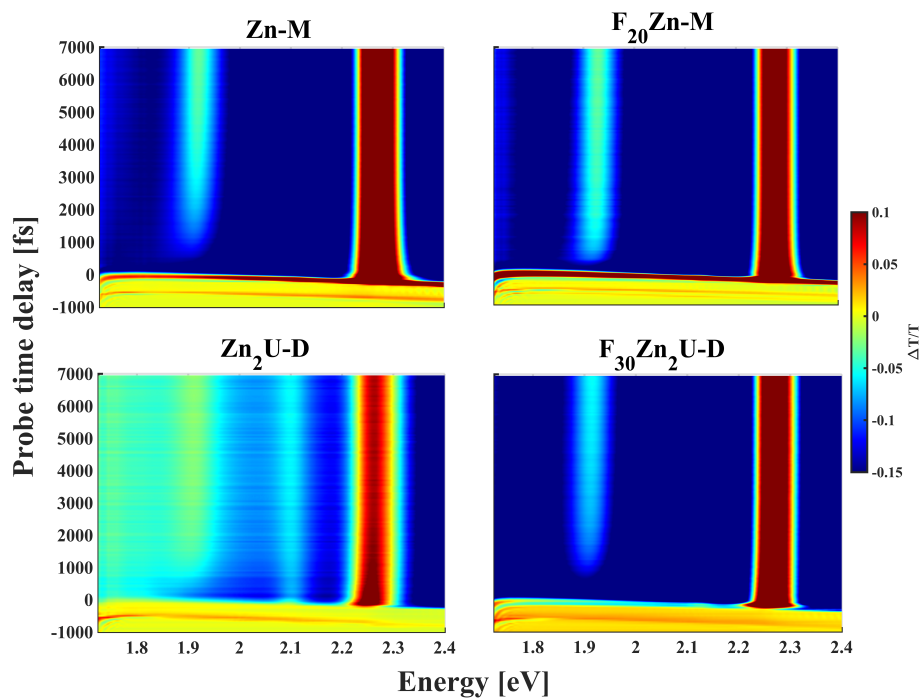

Figure S6: Transient transmission spectra of Zn-M (top left panel),  $F_{20}$ Zn-M (top right panel),  $Zn_2$ U-D (bottom left panel), and  $F_{30}$  $Zn_2$ U-D (bottom right panel) after photoexcitation at 2.85 eV.

## References



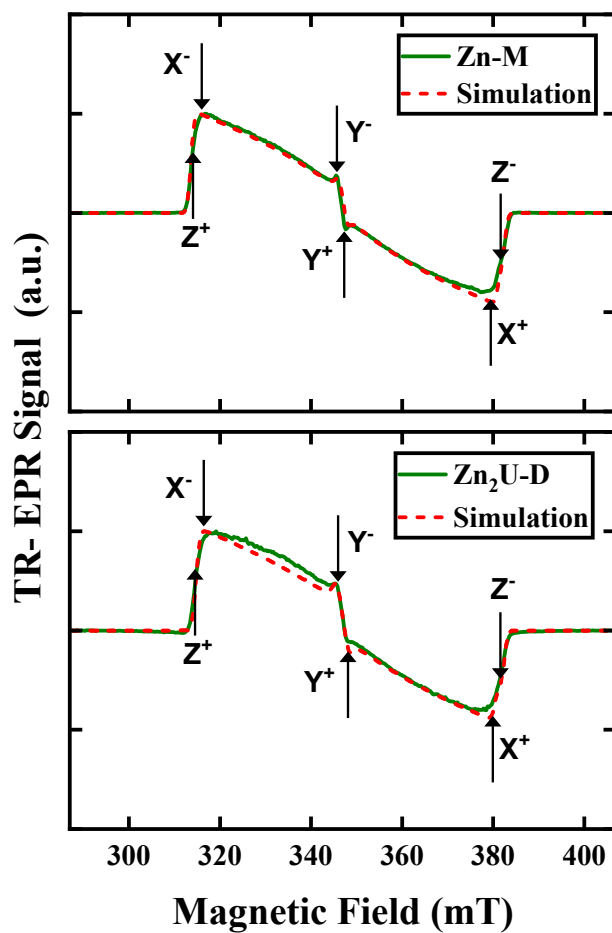

Figure S7: Comparisons between the measured (solid green) and simulated (dashed red) spectra of Zn-M (top panel) and Zn<sub>2</sub>U-D (bottom panel), which also show the assignments of transitions at the X<sup>+</sup>, X<sup>-</sup>, Y<sup>+</sup>, Y<sup>-</sup>, Z<sup>+</sup>, and Z<sup>-</sup> canonical field strengths.
